# Supplementary material for: The repressive role of Arabidopsis H2A.Z in transcriptional regulation depends on AtBMI1 activity
Source: PubMed Central journal article supplement (PMC6597585; doi:10.1038/s41467-019-10773-1), 2019-06-27
Supplement: 41467_2019_10773_MOESM1_ESM.pdf [file 41467_2019_10773_MOESM1_ESM.pdf]

**The repressive role of Arabidopsis H2A.Z in transcriptional regulation depends on  
AtBMI1 activity**

Gómez-Zambrano *et al.*

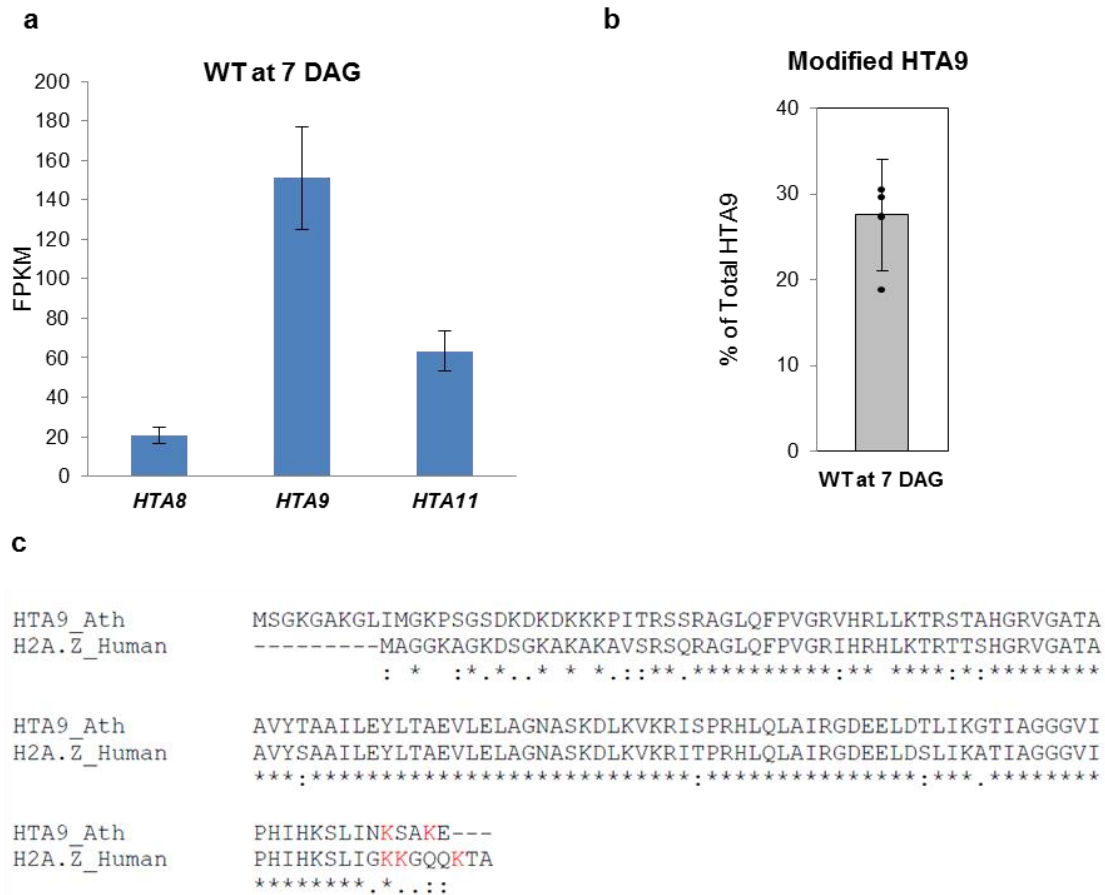

**Supplementary Figure 1. Arabidopsis H2A.Z coding genes.** (a) Expression levels of *HTA8*, *HTA9* and *HTA11* measured in FPKM in WT seedlings at 7 DAG. Error bars indicate standard deviation of n=2 biological replicates. (b) Percentage of total HTA9 representing modified HTA9. Error bars indicate standard deviation of n=4 independent WB experiments. Data points were indicated in the bar chart. (c) Protein sequence comparison of Arabidopsis HTA9 and human H2A.Z. In red are indicated the possible target lysine/s for monoubiquitination. Source data of Supplementary Figure 1b are provided as a Source Data file.

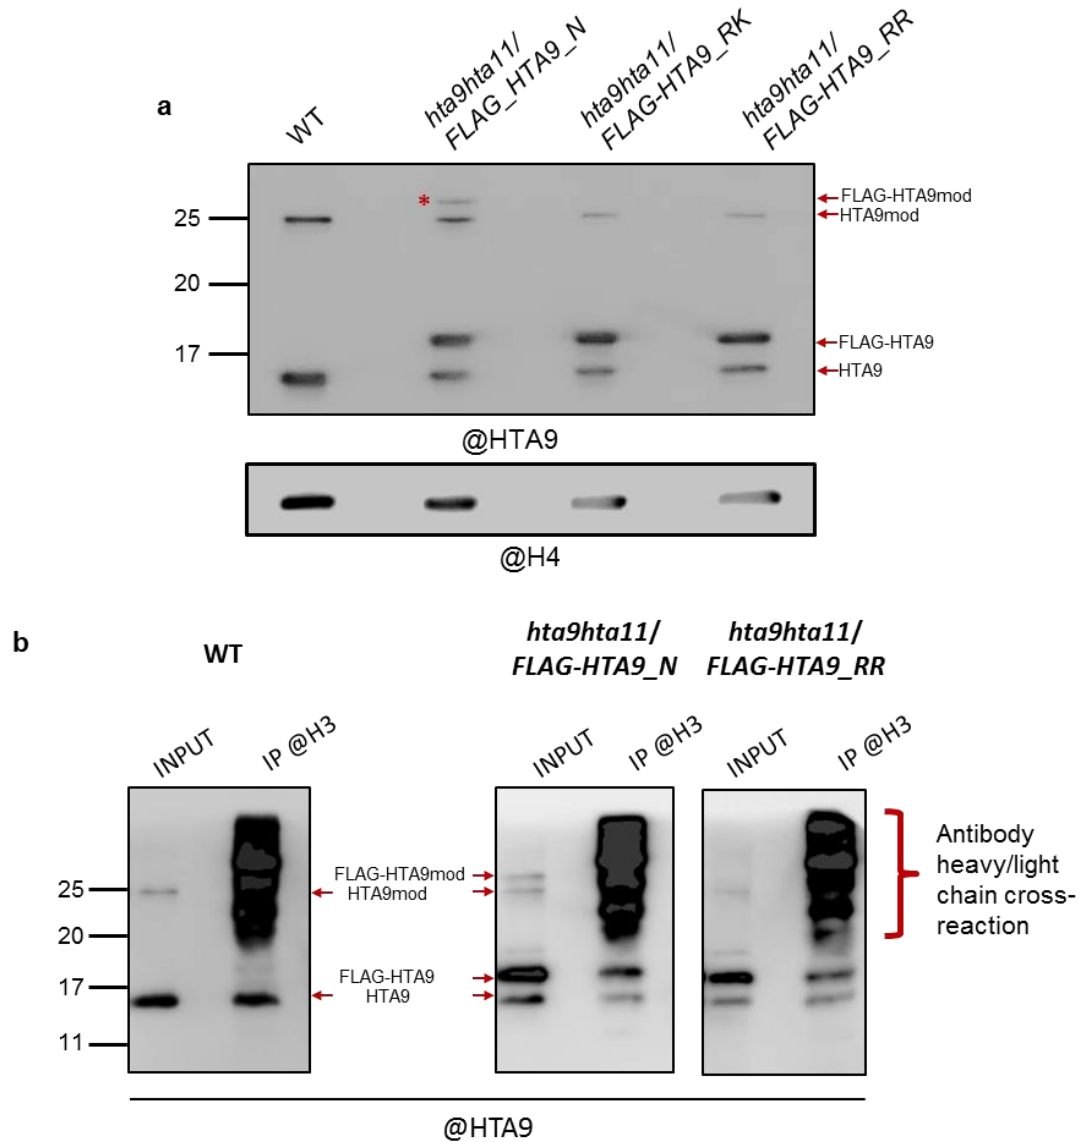

**Supplementary Figure 2. Detection of HTA9 and FLAG-HTA9 forms in *hta9hta11/FLAG-HTA9\_N*, *hta9hta11/FLAG-HTA9\_RK* and *hta9hta11/FLAG-HTA9\_RR* plants. (a) WB analysis of HTA9 and FLAG-HTA9 levels in WT, *hta9hta11/FLAG-HTA9\_N*, *hta9hta11/FLAG-HTA9\_RK* and *hta9hta11/FLAG-HTA9\_RR*. The modified FLAG-HTA9 band is only detected in *hta9hta11/FLAG-HTA9\_N* plants (asterisk). Some levels of HTA9 and modified HTA9 can be observed in mutant backgrounds as *hta9* is a knockdown allele. (b) Detection of HTA9 and FLAG-HTA9 in WT, *hta9hta11/FLAG-HTA9\_N* and *hta9hta11/FLAG-HTA9\_RR* chromatin immunoprecipitated with anti-H3 antibody. Arrows indicate the bands recognized by the antibody. Source data of Supplementary Figures 2a and 2b are provided as a Source Data file.**

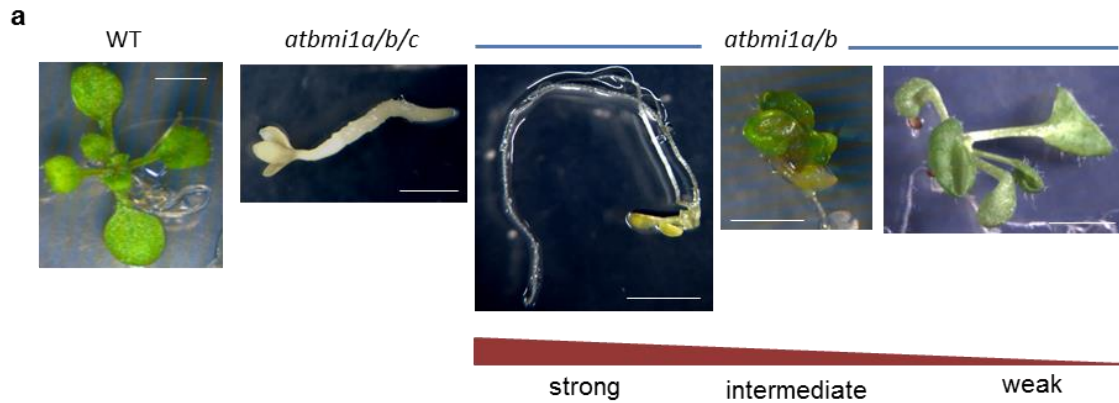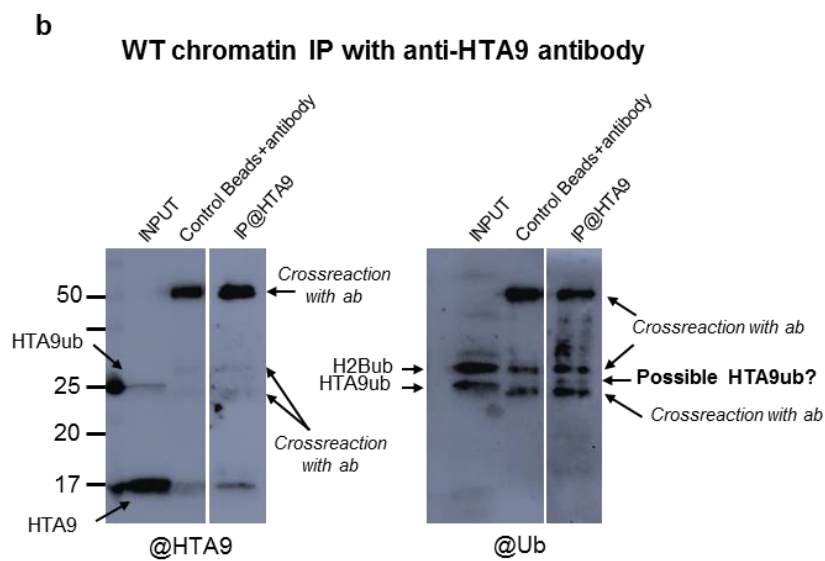

**Supplementary Figure 3. Loss of AtBMI1 function mutants and immunoprecipitation of possible HTA9ub.** (a) *atbmi1a/b/c* mutants are stuck in an embryo maturing phase after germination, while *atbmi1a/b* double mutants display a wide range of phenotypes, showing strong to weak alterations after germination, the weak phenotypes can grow on soil and produce seeds<sup>1</sup>. Bars indicate 2 mm. (b) Detection of HTA9ub using anti-ubiquitin antibodies in WT chromatin immunoprecipitated with anti-HTA9 (right panel). A similar blot was probed with anti-HTA9 to verify the presence of HTA9ub and the position of the band (left panel). Source data of Supplementary Figure 3b are provided as a Source Data file.

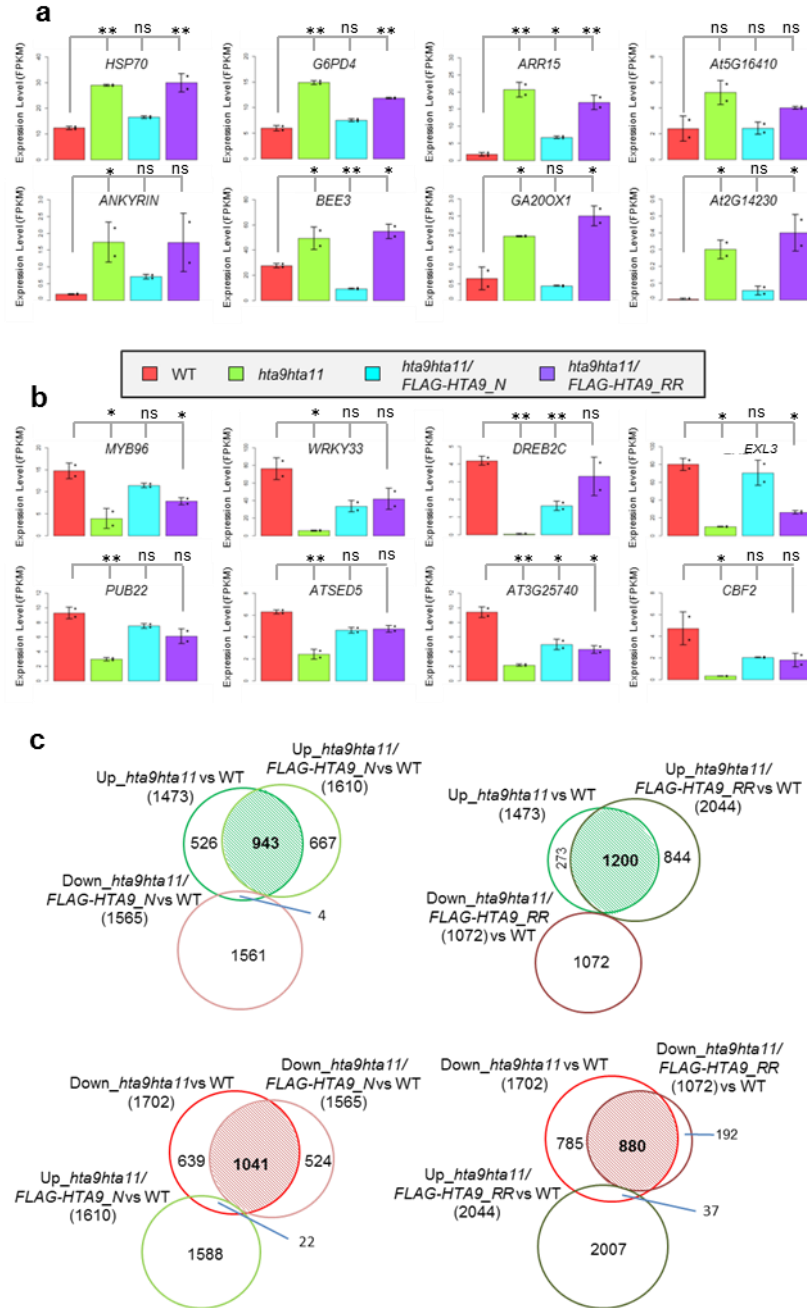

**Supplementary Figure 4. Expression levels of several misregulated genes in *hta9hta11* in different genotypes.** (a) Expression levels in WT, *hta9hta11*, *hta9hta11*/FLAG-HTA9\_N and *hta9hta11*/FLAG-HTA9\_RR of representative upregulated genes in *hta9hta11* at 7 DAG determined by RNA-seq. (b) Expression levels in WT, *hta9hta11*, *hta9hta11*/FLAG-HTA9\_N and *hta9hta11*/FLAG-HTA9\_RR of representative downregulated genes in *hta9hta11* at 7 DAG determined by RNA-seq. Expression levels are indicated in FPKM. Error bars indicate standard deviation of n=2 biological replicates. Dots indicate the expression levels in each biological replicate. Significant differences as determined by Student's t-test are indicated (\*\*P < 0.01; \*P < 0.05; ns, not significant). (c) Genes commonly up (green, two upper panels) and downregulated (red, two bottom panels) in *hta9hta11* and *hta9hta11*/FLAG-HTA9\_N or *hta9hta11*/FLAG-HTA9\_RR.

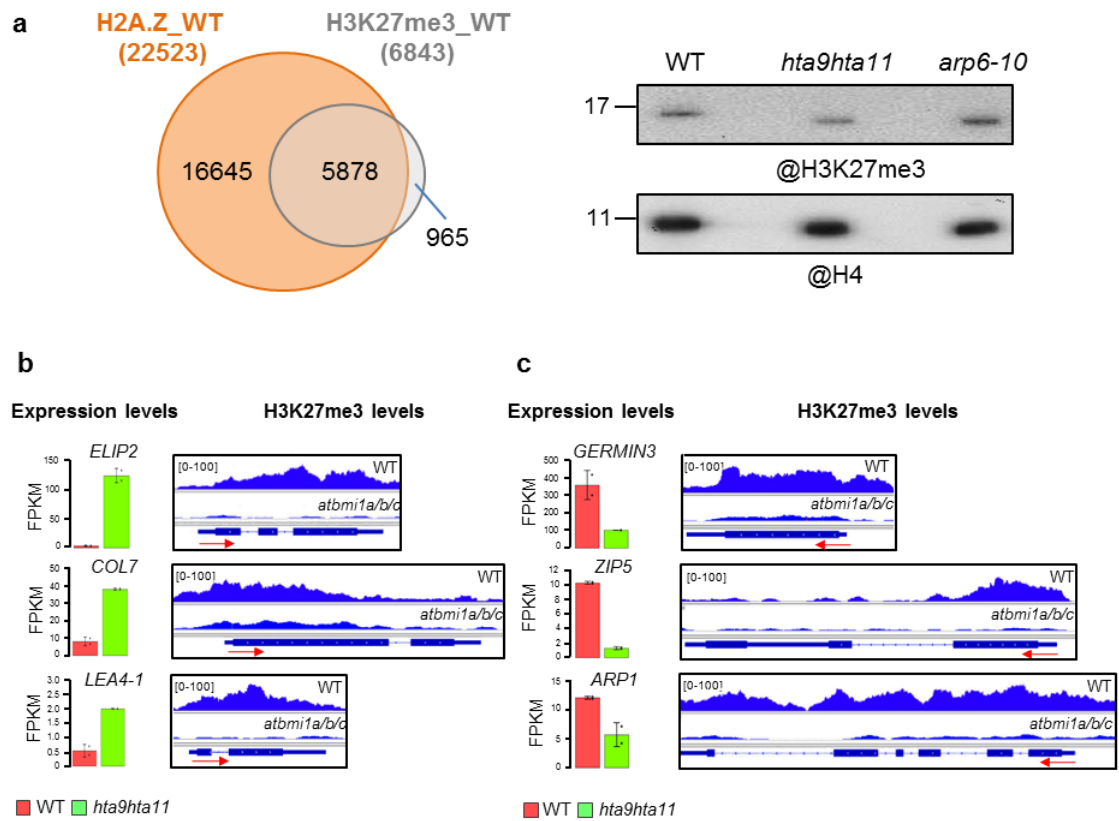

**Supplementary Figure 5. Representative *hta9hta11* misregulated genes marked with H3K27me3 in WT that loss the marks in *atbmi1a/b/c* mutants.** (a) Left panel, Venn diagram showing overlap between H2A.Z enriched genes and H3K27me3 marked genes in WT seedlings. 85.9% of H3K27me3 marked genes are enriched in H2A.Z. Right panel, Global levels of H3K27me3 in WT, *hta9hta11* and *arp6-10*. (b) Expression levels of three upregulated genes in *hta9hta11* indicated in FPKM and ChIP-seq genome browser view of H3K27me3 levels at the genes in WT and *atbmi1a/b/c* mutants. (c) Expression levels of three downregulated genes in *hta9hta11* indicated in FPKM (and ChIP-seq genome browser view of H3K27me3 levels at the genes in WT and *atbmi1a/b/c* mutants. Dots indicate the expression levels in each biological replicate. Error bars indicate standard deviation of n=2 biological replicates. Source data of Supplementary Figure 5a are provided as a Source Data file.

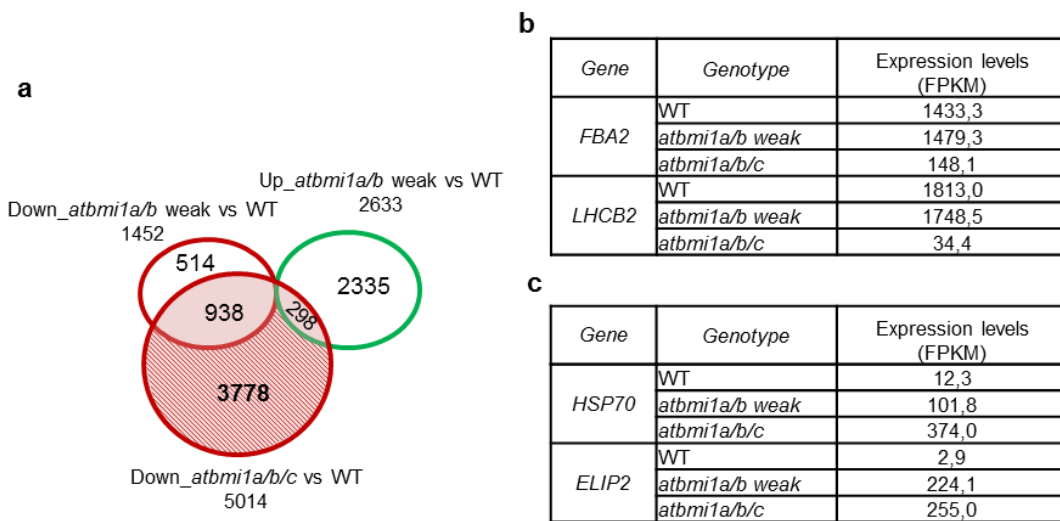

**Supplementary Figure 6. The levels of H2A.Z are higher at transcriptionally repressed genes. (a)** Venn diagram showing the number of genes downregulated in *atbmi1a/b/c* but not in *atbmi1a/b* weak. **(b)** Gene expression levels of *FBA2* and *LHCB2* indicated in FPKM, which are genes downregulated in *atbmi1a/b/c* but not in WT or *atbmi1a/b* weak. **(c)** Gene expression levels of *HSP70* and *ELIP2* indicated in FPKM, which are upregulated in both *atbmi1a/b* weak and *atbmi1a/b/c* mutants.

**Supplementary Table 1. Primers used in this work.**

|                  |                                                 |
|------------------|-------------------------------------------------|
| FLAG-HTA9 Fw     | AAACCATGGATTACAAGGATGACGACGATAAGATGTCGGGGAAAGGT |
| HTA9-N Rev       | TTTGGATCCCTATTCCCTTGGCGGATTTGTTGAT              |
| HTA9-RK Rev      | TTTGGATCCCTATTCCCTTGGCGGATCGGTTGAT              |
| HTA9-RR Rev      | TTTGGATCCCTATTCCCGGGCGGATCGGTTGAT               |
| qRT-PCR-FT Fw    | CGAACGGTGATGATGCCTATAGTAG                       |
| qRT-PCR-FT Rev   | CACTCTCATTTTCTCCCCCTCTC                         |
| qRT-PCR-FLCFw    | GCCACCTTAAATCGGCGGTTG                           |
| qRT-PCR-FT Rev   | CACAAAAGTCTCTTGCCAAAGAGAGAG                     |
| qRT-PCR-ACT2 Fw  | GTAACATTGTGCTCAGTGGTGG                          |
| qRT-PCR-ACT2 Rev | CTCGGCCCTTGAGATCCACATC                          |
| qPCR-ELIP2 1Fw   | TCGTTTAACATGCAGTCAGT                            |
| qPCR-ELIP2 1Rev  | GAGGAGACTGTGGCATT                               |
| qPCR-ELIP2 2Fw   | GGTGTCGGGTGGTTTCTAGG                            |
| qPCR-ELIP2 2Rev  | CATAGCTCGGCGTCTGAAGT                            |
| qPCR-LEA4-1 Fw   | AGCCAAGGAGAAGATGGTGA                            |
| qPCR-LEA4-1 Rev  | CGTTGGTGCCTATCTCTTT                             |
| qPCR-COL7 Fw     | GTTCTTCTCAAGGCCTCTCT                            |
| qPCR-COL7 Rev    | CCAACTAGCACGTGATCTCT                            |
| qPCR-FBA2 1Fw    | TTCCGGACTTTGCTGGTCTC                            |
| qPCR-FBA2 1Rev   | ATGTTCTGCTCGACGAGGAC                            |
| qPCR-FBA2 2Fw    | TTCCGGACTTTGCTGGTCTC                            |
| qPCR-FBA2 2Rev   | ATGTTCTGCTCGACGAGGAC                            |
| qPCR-GER3 Fw     | CTTTTGCCTCTGTTCAAGAC                            |
| qPCR-GER3 Rev    | GGCTTTAATGATGTTGGAAG                            |
| qPCR LHCB2 1Fw   | GAAGCAATGGCCACTTCAGC                            |
| qPCR LHCB2 1Rev  | CGGAGGAGATCGTTGGATGG                            |
| qPCR LHCB2 2Fw   | ACCCGTTGAACTTAGCGGAG                            |
| qPCR LHCB2 2Rev  | TAGCCACAGGGTCTGCAATG                            |
| qPCR-ARP1 Fw     | GTCCACCAATCTGCTACTCT                            |
| qPCR-ARP1 Rev    | CTCCTACGAACACTTTGGTC                            |
| qPCR-ZIP5 Fw     | CACAAAACGTCAAGCTCTTA                            |
| qPCR-ZIP5 Rev    | TTGCCTAGTAACGGAAACAT                            |
| qPCR-ACT7 Fw     | GCGATGTTTGAGTTTCAATAAACGCTGC                    |
| qPCR-ACT7 Rev    | CTCACCTTCACCATTCCAGTTCCA                        |
| qPCR-HSP70 1Fw   | TCTCTTAAAGCTCACAGACGAA <sup>2</sup>             |
| qPCR-HSP70 1Rev  | CTGTCAGTGAAAGCAACGTAGG <sup>2</sup>             |
| qPCR-HSP70 2Fw   | GTCGAGTGTGGCGAGAAGA                             |
| qPCR-HSP70 2Rev  | CCGCTCACAAAGCTGTCCTAA                           |
| qPCR-FLC 1Fw     | CTCCTCCGGCGATAAGTACG                            |
| qPCR-FLC 1Rev    | GCTGACGAGCTTTCTCGATG                            |
| qPCR-FLC 2Fw     | TCTGGTTATCGATTGCGATTCT                          |
| qPCR-FLC 2Rev    | GTTCTCTTGGATTTGTATATGCACG                       |



### Supplementary References

1. Bratzel, F., López-Torrejón, G., Koch, M., Del Pozo, J. C. & Calonje, M. Keeping cell identity in Arabidopsis requires PRC1 RING-finger homologs that catalyze H2A monoubiquitination. *Curr. Biol.* **20**, 1853–1859 (2010).
2. Kumar, S. V. & Wigge, P. A. H2A.Z-containing nucleosomes mediate the thermosensory response in Arabidopsis. *Cell* **140**, 136–147 (2010).
